# Supplementary material for: Transformative potential of conservation actions
Source: Research Square preprint supplement (doi:10.21203/rs.3.rs-2331290/v1), 2022-12-05
Supplement: Supplementary file 1 [file d5f148708a45725403dc4d46.docx]

Table 1. Strong/weak transformative potential of conservation actions in dark/light tone. Sustainability leverage points by Meadows (1999) and system characteristics by Abson (2017).

|  | System characteristics | PARAMETERS | | | FEEDBACKS | | | DESIGN | | | INTENT | | |
| --- | --- | --- | --- | --- | --- | --- | --- | --- | --- | --- | --- | --- | --- |
|  | Leverage points | LP12 | LP11 | LP10 | LP9 | LP8 | LP7 | LP6 | LP5 | LP4 | LP3 | LP2 | LP1 |
| A. TARGET RESTORATION / STRESS REDUCTION ACTIONS | | | | | | | | | | | | | |
| 1. Land / Water Management | | | | | | | | | | | | | |
|  | 1.1 Site/Area stewardship |  |  |  |  |  |  |  |  |  |  |  |  |
|  | 1.2 Ecosystem & Natural Process (Re)Creation |  |  |  |  |  |  |  |  |  |  |  |  |
| 2. Species Management | |  |  |  |  |  |  |  |  |  |  |  |  |
|  | 2.1 Species Stewardship |  |  |  |  |  |  |  |  |  |  |  |  |
|  | 2.2 Species Re-Introduction & Translocation |  |  |  |  |  |  |  |  |  |  |  |  |
|  | 2.3 Ex-Situ Conservation |  |  |  |  |  |  |  |  |  |  |  |  |
| B. BEHAVORIAL CHANGE / THREAT REDUCTION ACTIONS | | | | | | | | | | | | | |
| 3. Awareness Raising | | | | | | | | | | | | | |
|  | 3.1 Outreach & Communications |  |  |  |  |  |  |  |  |  |  |  |  |
|  | 3.2 Protests & Civil Disobedience |  |  |  |  |  |  |  |  |  |  |  |  |
| 4. Law Enforcement & Prosecution | | | | | | | | | | | | | |
|  | 4.1 Detection & Arrest |  |  |  |  |  |  |  |  |  |  |  |  |
|  | 4.2 Criminal Prosecution & Conviction |  |  |  |  |  |  |  |  |  |  |  |  |
|  | 4.3 Non-Criminal Legal Action |  |  |  |  |  |  |  |  |  |  |  |  |
| 5. Livelihood, Economic & Moral Incentives | | | | | | | | | | | | | |
|  | 5.1 Linked Enterprises & Alternative Livelihoods |  |  |  |  |  |  |  |  |  |  |  |  |
|  | 5.2 Better Products & Management Practices |  |  |  |  |  |  |  |  |  |  |  |  |
|  | 5.3 Market-Based Incentives |  |  |  |  |  |  |  |  |  |  |  |  |
|  | 5.4 Direct Economic Incentives |  |  |  |  |  |  |  |  |  |  |  |  |
|  | 5.5 Non-Monetary Values |  |  |  |  |  |  |  |  |  |  |  |  |
| C. ENABLING CONDITION ACTIONS | | | | | | | | | | | | | |
| 6. Conservation Designation & Planning | | | | | | | | | | | | | |
|  | 6.1 Protected Area Designation &/or Acquisition |  |  |  |  |  |  |  |  |  |  |  |  |
|  | 6.2 Easements & Resource Rights |  |  |  |  |  |  |  |  |  |  |  |  |
|  | 6.3 Land/Water Use Zoning & Designation |  |  |  |  |  |  |  |  |  |  |  |  |
|  | 6.4 Conservation Planning |  |  |  |  |  |  |  |  |  |  |  |  |
|  | 6.5 Site Infrastructure |  |  |  |  |  |  |  |  |  |  |  |  |
| 7. Legal & Policy Frameworks | | | | | | | | | | | | | |
|  | 7.1 Laws, Regulations & Codes |  |  |  |  |  |  |  |  |  |  |  |  |
|  | 7.2 Policies & Guidelines |  |  |  |  |  |  |  |  |  |  |  |  |
| 8. Research & Monitoring | | | | | | | | | | | | | |
|  | 8.1 Basic Research & Status Monitoring |  |  |  |  |  |  |  |  |  |  |  |  |
|  | 8.2 Evaluation, Effectiveness Measures & Learning |  |  |  |  |  |  |  |  |  |  |  |  |
| 9. Education & Training | | | | | | | | | | | | | |
|  | 9.1 Formal Education |  |  |  |  |  |  |  |  |  |  |  |  |
|  | 9.2 Training & Individual Capacity Development |  |  |  |  |  |  |  |  |  |  |  |  |
| 10. Institutional Development | | | | | | | | | | | | | |
|  | 10.1 Internal Organizational Management & Administration |  |  |  |  |  |  |  |  |  |  |  |  |
|  | 10.2 External Organizational Development & Support |  |  |  |  |  |  |  |  |  |  |  |  |
|  | 10.3 Alliance & Partnership Development |  |  |  |  |  |  |  |  |  |  |  |  |
|  | 10.4 Financing Conservation |  |  |  |  |  |  |  |  |  |  |  |  |
